# Supplementary material for: Quantum algorithms to compute the neighbour list of N-body simulations
Source: Springer Nature journal article supplement (doi:10.1007/s11128-023-04245-1), 2024-02-13
Supplement: 11128_2023_4245_MOESM1_ESM.pdf [file 11128_2023_4245_MOESM1_ESM.pdf]

## SUPPLEMENTARY MATERIAL

### Results for the Algorithm 2 and Algorithm 3 experiments

In this Appendix, we present the full set of results for the experiments performed with Algorithms 2 and 3. In all the cases, we have consider values of  $R$  ranging from 5 to 70, number of particles 125, 216, 512 and 1000, and  $\mu = 40, 80, 150$ . The results are shown in Tables C.20 through C.43. In all the cases, we present the values of  $R$  and the number of times that not all particle pairs were recovered (“Fails”), together with minimum, maximum, average and standard deviation of the number of oracle queries.

| R  | Fails  | Minimum | Maximum | Average   | Standard deviation |
|----|--------|---------|---------|-----------|--------------------|
| 5  | 718450 | 40      | 7418    | 2939.6492 | 1717.0896          |
| 10 | 41249  | 197     | 9648    | 5569.0876 | 852.5619           |
| 15 | 1505   | 654     | 9932    | 6009.2337 | 671.0525           |
| 20 | 58     | 1211    | 10080   | 6329.9406 | 669.5504           |
| 25 | 4      | 4001    | 10578   | 6648.2113 | 674.7998           |
| 30 | 0      | 4275    | 11155   | 6966.1094 | 679.7743           |
| 35 | 0      | 4324    | 11405   | 7283.0392 | 684.7065           |
| 40 | 0      | 4928    | 11613   | 7600.7908 | 690.3017           |
| 45 | 0      | 5189    | 12223   | 7918.7430 | 695.0099           |
| 50 | 0      | 5315    | 12237   | 8237.5179 | 699.4031           |
| 55 | 0      | 5641    | 12459   | 8553.4562 | 704.2803           |
| 60 | 0      | 5777    | 12843   | 8872.4479 | 708.3241           |
| 65 | 0      | 6195    | 12964   | 9189.5284 | 712.8600           |
| 70 | 0      | 6528    | 13612   | 9505.8860 | 718.6782           |

Table C.20. # of fails and minimum, maximum, average and standard deviation of the number of oracle queries for  $10^6$  repetitions of Algorithm 2 with 125 particles and  $\mu = 40$

| R  | Fails | Minimum | Maximum | Average   | Standard deviation |
|----|-------|---------|---------|-----------|--------------------|
| 5  | 2824  | 386     | 3712    | 2228.2688 | 217.8424           |
| 10 | 67    | 1165    | 4018    | 2548.1559 | 232.4877           |
| 15 | 1     | 1813    | 4630    | 2866.3376 | 246.8998           |
| 20 | 0     | 2027    | 4928    | 3183.3695 | 260.2819           |
| 25 | 0     | 2322    | 5271    | 3500.6617 | 273.3451           |
| 30 | 0     | 2597    | 5657    | 3818.5138 | 285.3814           |
| 35 | 0     | 2701    | 5959    | 4136.2548 | 297.1029           |
| 40 | 0     | 2964    | 6127    | 4453.5569 | 308.5054           |
| 45 | 0     | 3190    | 6810    | 4770.9495 | 319.0550           |
| 50 | 0     | 3463    | 6904    | 5088.6793 | 329.8067           |
| 55 | 0     | 3823    | 7400    | 5405.9980 | 339.7549           |
| 60 | 0     | 4015    | 7586    | 5723.9451 | 349.8596           |
| 65 | 0     | 4329    | 7833    | 6040.8812 | 359.2226           |
| 70 | 0     | 4647    | 8415    | 6358.7057 | 368.9050           |

Table C.21. # of fails and minimum, maximum, average and standard deviation of the number of oracle queries for  $10^6$  repetitions of Algorithm 3 with 125 particles and  $\mu = 40$

| R  | Fails  | Minimum | Maximum | Average    | Standard deviation |
|----|--------|---------|---------|------------|--------------------|
| 5  | 718628 | 37      | 15516   | 5901.4243  | 3448.7590          |
| 10 | 41357  | 503     | 18982   | 11181.1341 | 1714.4627          |
| 15 | 1556   | 1420    | 20896   | 12065.4905 | 1345.8739          |
| 20 | 54     | 2051    | 21332   | 12711.5539 | 1341.5124          |
| 25 | 2      | 6818    | 21172   | 13349.2033 | 1353.0338          |
| 30 | 0      | 8783    | 22207   | 13987.1952 | 1364.4461          |
| 35 | 0      | 8966    | 23816   | 14624.5805 | 1373.5282          |
| 40 | 0      | 9563    | 22670   | 15264.0114 | 1382.1603          |
| 45 | 0      | 10208   | 23718   | 15898.3035 | 1392.8924          |
| 50 | 0      | 11040   | 24741   | 16537.0394 | 1403.1162          |
| 55 | 0      | 11684   | 25428   | 17174.2995 | 1412.9613          |
| 60 | 0      | 12096   | 26344   | 17812.5433 | 1421.5418          |
| 65 | 0      | 12830   | 27214   | 18450.4361 | 1431.4450          |
| 70 | 0      | 13201   | 28141   | 19089.2051 | 1441.6392          |

Table C.22. # of fails and minimum, maximum, average and standard deviation of the number of oracle queries for  $10^6$  repetitions of Algorithm 2 with 216 particles and  $\mu = 40$

| R  | Fails | Minimum | Maximum | Average    | Standard deviation |
|----|-------|---------|---------|------------|--------------------|
| 5  | 2377  | 898     | 7689    | 4825.1556  | 445.2583           |
| 10 | 59    | 2104    | 8534    | 5466.6574  | 473.8216           |
| 15 | 3     | 3780    | 9491    | 6103.8121  | 501.5960           |
| 20 | 0     | 4255    | 10959   | 6742.7040  | 528.9813           |
| 25 | 0     | 4824    | 11518   | 7379.4405  | 553.3524           |
| 30 | 0     | 5463    | 11685   | 8016.7392  | 577.5888           |
| 35 | 0     | 5995    | 12124   | 8654.2270  | 601.4419           |
| 40 | 0     | 6501    | 13166   | 9292.0317  | 623.7913           |
| 45 | 0     | 6944    | 13961   | 9930.4703  | 645.1531           |
| 50 | 0     | 7375    | 14465   | 10567.1632 | 666.4657           |
| 55 | 0     | 8018    | 15225   | 11204.3752 | 685.5598           |
| 60 | 0     | 8800    | 15461   | 11840.9150 | 705.6348           |
| 65 | 0     | 9069    | 16568   | 12478.6143 | 724.6778           |
| 70 | 0     | 9830    | 17082   | 13115.8680 | 743.3970           |

Table C.23. # of fails and minimum, maximum, average and standard deviation of the number of oracle queries for  $10^6$  repetitions of Algorithm 3 with 216 particles and  $\mu = 40$

| R  | Fails  | Minimum | Maximum | Average    | Standard deviation |
|----|--------|---------|---------|------------|--------------------|
| 5  | 718791 | 160     | 30868   | 11825.2023 | 6914.3259          |
| 10 | 41221  | 878     | 38631   | 22403.9427 | 3427.6403          |
| 15 | 1517   | 2051    | 40597   | 24178.9512 | 2702.7087          |
| 20 | 57     | 4604    | 39848   | 25475.3335 | 2691.4411          |
| 25 | 1      | 7201    | 43896   | 26750.3906 | 2707.0025          |
| 30 | 0      | 17789   | 43981   | 28031.4853 | 2729.6234          |
| 35 | 0      | 18180   | 44091   | 29304.0688 | 2750.3152          |
| 40 | 0      | 19496   | 46887   | 30585.1129 | 2770.6149          |
| 45 | 0      | 20388   | 48264   | 31859.0301 | 2788.2287          |
| 50 | 0      | 21896   | 49474   | 33138.2467 | 2807.0429          |
| 55 | 0      | 23460   | 49567   | 34416.2805 | 2826.3657          |
| 60 | 0      | 24140   | 50592   | 35691.7640 | 2850.4040          |
| 65 | 0      | 24539   | 51950   | 36970.7488 | 2867.3966          |
| 70 | 0      | 26362   | 54432   | 38242.6094 | 2887.9825          |

Table C.24. # of fails and minimum, maximum, average and standard deviation of the number of oracle queries for  $10^6$  repetitions of Algorithm 2 with 512 particles and  $\mu = 40$

| R  | Fails | Minimum | Maximum | Average    | Standard deviation |
|----|-------|---------|---------|------------|--------------------|
| 5  | 1923  | 1910    | 15753   | 10145.7909 | 902.9648           |
| 10 | 44    | 4633    | 17451   | 11432.0083 | 960.5882           |
| 15 | 3     | 8536    | 20316   | 12710.2747 | 1015.7321          |
| 20 | 0     | 8806    | 22982   | 13986.8836 | 1067.2772          |
| 25 | 0     | 10351   | 22902   | 15264.6188 | 1117.9356          |
| 30 | 0     | 11131   | 23273   | 16540.8108 | 1166.4377          |
| 35 | 0     | 12455   | 25087   | 17819.0396 | 1212.3312          |
| 40 | 0     | 13582   | 26600   | 19095.3893 | 1255.3162          |
| 45 | 0     | 14479   | 28519   | 20374.3377 | 1298.8724          |
| 50 | 0     | 14841   | 28812   | 21648.2902 | 1342.0320          |
| 55 | 0     | 16772   | 30478   | 22927.2429 | 1380.5863          |
| 60 | 0     | 17651   | 32652   | 24205.4284 | 1419.4951          |
| 65 | 0     | 18730   | 34298   | 25486.3516 | 1457.7054          |
| 70 | 0     | 19923   | 34743   | 26760.8443 | 1494.1648          |

Table C.25. # of fails and minimum, maximum, average and standard deviation of the number of oracle queries for  $10^6$  repetitions of Algorithm 3 with 512 particles and  $\mu = 40$

| R  | Fails  | Minimum | Maximum | Average    | Standard deviation |
|----|--------|---------|---------|------------|--------------------|
| 5  | 718391 | 166     | 63409   | 23683.5436 | 13833.8447         |
| 10 | 40895  | 2324    | 75457   | 44862.0495 | 6874.5329          |
| 15 | 1492   | 5649    | 77415   | 48402.0877 | 5402.9775          |
| 20 | 72     | 9992    | 85992   | 50994.6734 | 5381.6955          |
| 25 | 2      | 20000   | 84930   | 53551.7566 | 5423.7290          |
| 30 | 0      | 34156   | 90053   | 56105.2792 | 5462.8954          |
| 35 | 0      | 36937   | 89677   | 58674.4402 | 5503.6964          |
| 40 | 0      | 38349   | 91133   | 61227.9910 | 5542.4209          |
| 45 | 0      | 40524   | 97136   | 63783.1961 | 5582.8703          |
| 50 | 0      | 43766   | 99471   | 66336.5767 | 5621.0076          |
| 55 | 0      | 46921   | 101023  | 68902.9617 | 5656.8642          |
| 60 | 0      | 46568   | 104222  | 71462.3188 | 5697.8280          |
| 65 | 0      | 48738   | 107966  | 74008.3424 | 5741.4485          |
| 70 | 0      | 54323   | 109460  | 76582.4883 | 5770.1841          |

Table C.26. # of fails and minimum, maximum, average and standard deviation of the number of oracle queries for  $10^6$  repetitions of Algorithm 2 with 1000 particles and  $\mu = 40$

| R  | Fails | Minimum | Maximum | Average    | Standard deviation |
|----|-------|---------|---------|------------|--------------------|
| 5  | 1635  | 4265    | 31542   | 20964.4723 | 1823.0690          |
| 10 | 39    | 13441   | 35629   | 23536.2271 | 1936.5643          |
| 15 | 0     | 16590   | 37738   | 26093.3338 | 2046.9211          |
| 20 | 0     | 19203   | 43485   | 28652.9518 | 2151.9537          |
| 25 | 0     | 21504   | 46209   | 31208.2892 | 2250.5519          |
| 30 | 0     | 23149   | 48898   | 33770.6442 | 2342.3008          |
| 35 | 0     | 24765   | 49575   | 36319.7148 | 2434.8336          |
| 40 | 0     | 27083   | 56501   | 38880.8974 | 2525.8832          |
| 45 | 0     | 30029   | 56789   | 41439.2587 | 2609.3545          |
| 50 | 0     | 31775   | 58314   | 43996.7575 | 2693.1135          |
| 55 | 0     | 33189   | 61831   | 46553.6430 | 2770.0797          |
| 60 | 0     | 35264   | 65534   | 49114.7834 | 2850.8926          |
| 65 | 0     | 38689   | 67909   | 51672.2018 | 2926.7659          |
| 70 | 0     | 39434   | 71960   | 54225.1105 | 2999.7123          |

Table C.27. # of fails and minimum, maximum, average and standard deviation of the number of oracle queries for  $10^6$  repetitions of Algorithm 3 with 1000 particles and  $\mu = 40$

| R  | Fails  | Minimum | Maximum | Average    | Standard deviation |
|----|--------|---------|---------|------------|--------------------|
| 5  | 923296 | 25      | 13624   | 3635.9636  | 2856.8485          |
| 10 | 80365  | 279     | 15537   | 10336.4948 | 1842.9808          |
| 15 | 2888   | 624     | 16060   | 11098.5778 | 983.8430           |
| 20 | 98     | 1196    | 16695   | 11430.6496 | 942.7164           |
| 25 | 5      | 3176    | 17785   | 11750.7350 | 945.5938           |
| 30 | 0      | 8209    | 17179   | 12066.4249 | 948.4360           |
| 35 | 0      | 8317    | 17552   | 12385.7663 | 952.5189           |
| 40 | 0      | 8636    | 17778   | 12701.6750 | 956.0423           |
| 45 | 0      | 8748    | 17962   | 13021.0638 | 958.9156           |
| 50 | 0      | 9394    | 18442   | 13336.8252 | 963.1836           |
| 55 | 0      | 9767    | 19120   | 13654.1344 | 967.2429           |
| 60 | 0      | 9806    | 19565   | 13972.2885 | 970.1708           |
| 65 | 0      | 10307   | 19695   | 14291.1269 | 972.7903           |
| 70 | 0      | 10502   | 19788   | 14607.5681 | 976.9584           |

Table C.28. # of fails and minimum, maximum, average and standard deviation of the number of oracle queries for  $10^6$  repetitions of Algorithm 2 with 125 particles and  $\mu = 80$

| R  | Fails | Minimum | Maximum | Average   | Standard deviation |
|----|-------|---------|---------|-----------|--------------------|
| 5  | 2862  | 452     | 4268    | 2859.8728 | 231.2177           |
| 10 | 70    | 1063    | 4739    | 3179.8891 | 244.7497           |
| 15 | 4     | 2322    | 5091    | 3497.5590 | 258.2530           |
| 20 | 0     | 2572    | 5504    | 3815.2131 | 271.0638           |
| 25 | 0     | 2887    | 5860    | 4132.6062 | 283.2911           |
| 30 | 0     | 3173    | 6244    | 4449.8254 | 295.0987           |
| 35 | 0     | 3438    | 6949    | 4767.5163 | 306.8322           |
| 40 | 0     | 3646    | 6940    | 5085.1520 | 317.8033           |
| 45 | 0     | 3916    | 7512    | 5402.9935 | 327.4926           |
| 50 | 0     | 4177    | 7580    | 5720.4103 | 338.1065           |
| 55 | 0     | 4443    | 7898    | 6037.9105 | 348.5818           |
| 60 | 0     | 4525    | 8792    | 6355.0305 | 357.9535           |
| 65 | 0     | 5042    | 8803    | 6672.3907 | 367.2009           |
| 70 | 0     | 5055    | 9106    | 6990.2224 | 376.5325           |

Table C.29. # of fails and minimum, maximum, average and standard deviation of the number of oracle queries for  $10^6$  repetitions of Algorithm 3 with 125 particles and  $\mu = 80$

| R  | Fails  | Minimum | Maximum | Average    | Standard deviation |
|----|--------|---------|---------|------------|--------------------|
| 5  | 923535 | 53      | 26838   | 7278.0833  | 5732.9068          |
| 10 | 80164  | 466     | 30978   | 20764.6058 | 3686.2588          |
| 15 | 2893   | 1269    | 33464   | 22288.0032 | 1971.9172          |
| 20 | 98     | 3378    | 34485   | 22956.6472 | 1888.5995          |
| 25 | 4      | 6163    | 33952   | 23589.5022 | 1897.7596          |
| 30 | 0      | 16616   | 35536   | 24232.5031 | 1905.1978          |
| 35 | 0      | 16131   | 35181   | 24866.5963 | 1909.3065          |
| 40 | 0      | 18018   | 36800   | 25505.5612 | 1916.9934          |
| 45 | 0      | 17745   | 37909   | 26141.1385 | 1921.6054          |
| 50 | 0      | 18943   | 37610   | 26782.8205 | 1929.7497          |
| 55 | 0      | 19437   | 37705   | 27416.0201 | 1936.2964          |
| 60 | 0      | 20150   | 38316   | 28058.5007 | 1945.9851          |
| 65 | 0      | 20475   | 39788   | 28694.4024 | 1955.4758          |
| 70 | 0      | 20119   | 40084   | 29329.3894 | 1956.2711          |

Table C.30. # of fails and minimum, maximum, average and standard deviation of the number of oracle queries for  $10^6$  repetitions of Algorithm 2 with 216 particles and  $\mu = 80$

| R  | Fails | Minimum | Maximum | Average    | Standard deviation |
|----|-------|---------|---------|------------|--------------------|
| 5  | 2392  | 1059    | 9052    | 6325.5507  | 474.2337           |
| 10 | 72    | 2573    | 10293   | 6967.4328  | 500.9015           |
| 15 | 0     | 5310    | 11499   | 7605.0946  | 527.7988           |
| 20 | 0     | 5832    | 11881   | 8242.9234  | 552.6728           |
| 25 | 0     | 6322    | 13802   | 8880.8130  | 577.3092           |
| 30 | 0     | 6792    | 13112   | 9517.5153  | 600.0381           |
| 35 | 0     | 7086    | 14341   | 10155.0858 | 621.8501           |
| 40 | 0     | 7719    | 14952   | 10793.2809 | 644.4091           |
| 45 | 0     | 8440    | 15185   | 11430.6318 | 664.4279           |
| 50 | 0     | 8552    | 15962   | 12067.8135 | 685.1698           |
| 55 | 0     | 9246    | 16926   | 12704.4590 | 703.8530           |
| 60 | 0     | 9872    | 17237   | 13343.4304 | 723.7423           |
| 65 | 0     | 10533   | 17705   | 13979.7554 | 743.0180           |
| 70 | 0     | 10967   | 18852   | 14618.0132 | 760.9026           |

Table C.31. # of fails and minimum, maximum, average and standard deviation of the number of oracle queries for  $10^6$  repetitions of Algorithm 3 with 216 particles and  $\mu = 80$

| R  | Fails  | Minimum | Maximum | Average    | Standard deviation |
|----|--------|---------|---------|------------|--------------------|
| 5  | 923253 | 187     | 52725   | 14611.2056 | 11490.1537         |
| 10 | 80134  | 1061    | 63761   | 41596.0359 | 7411.9602          |
| 15 | 2842   | 2385    | 67161   | 44658.7835 | 3943.5957          |
| 20 | 108    | 3890    | 67044   | 46001.3135 | 3790.5698          |
| 25 | 2      | 10629   | 68236   | 47280.9809 | 3798.1814          |
| 30 | 0      | 33531   | 69521   | 48549.5045 | 3805.9196          |
| 35 | 0      | 32346   | 70270   | 49839.0316 | 3822.6188          |
| 40 | 0      | 34265   | 71939   | 51111.6997 | 3840.7633          |
| 45 | 0      | 36299   | 73514   | 52389.4730 | 3858.2295          |
| 50 | 0      | 37650   | 74989   | 53670.5450 | 3874.8880          |
| 55 | 0      | 39547   | 76226   | 54943.0548 | 3881.4406          |
| 60 | 0      | 39633   | 76825   | 56222.5949 | 3896.9765          |
| 65 | 0      | 41269   | 79521   | 57496.3640 | 3908.8121          |
| 70 | 0      | 42185   | 80082   | 58775.9391 | 3928.2244          |

Table C.32. # of fails and minimum, maximum, average and standard deviation of the number of oracle queries for  $10^6$  repetitions of Algorithm 2 with 512 particles and  $\mu = 80$

| R  | Fails | Minimum | Maximum | Average    | Standard deviation |
|----|-------|---------|---------|------------|--------------------|
| 5  | 1950  | 2115    | 19522   | 13470.1575 | 961.4043           |
| 10 | 54    | 4566    | 20804   | 14756.1635 | 1014.3651          |
| 15 | 4     | 11101   | 22472   | 16033.6005 | 1066.0397          |
| 20 | 0     | 12368   | 24762   | 17312.6776 | 1117.6257          |
| 25 | 0     | 12699   | 26817   | 18589.4395 | 1166.2992          |
| 30 | 0     | 14627   | 28121   | 19865.9294 | 1212.8327          |
| 35 | 0     | 15245   | 28624   | 21143.3044 | 1254.8767          |
| 40 | 0     | 16422   | 29459   | 22422.5002 | 1298.9550          |
| 45 | 0     | 17223   | 31994   | 23698.2628 | 1339.9998          |
| 50 | 0     | 18717   | 32834   | 24978.4924 | 1380.1082          |
| 55 | 0     | 19943   | 33593   | 26254.1776 | 1418.1368          |
| 60 | 0     | 20652   | 35096   | 27534.4299 | 1456.9480          |
| 65 | 0     | 21862   | 38463   | 28808.9218 | 1493.8088          |
| 70 | 0     | 23100   | 38009   | 30084.4850 | 1529.7581          |

Table C.33. # of fails and minimum, maximum, average and standard deviation of the number of oracle queries for  $10^6$  repetitions of Algorithm 3 with 512 particles and  $\mu = 80$

| R  | Fails  | Minimum | Maximum | Average     | Standard deviation |
|----|--------|---------|---------|-------------|--------------------|
| 5  | 923323 | 255     | 104888  | 29222.7712  | 2856.8485          |
| 10 | 79935  | 2390    | 129834  | 83289.8695  | 1842.9808          |
| 15 | 2916   | 4740    | 134464  | 89407.7511  | 983.8430           |
| 20 | 88     | 7803    | 133875  | 92074.9924  | 942.7164           |
| 25 | 2      | 64634   | 135505  | 94648.8913  | 945.5938           |
| 30 | 0      | 66544   | 139891  | 97211.9290  | 948.4360           |
| 35 | 0      | 67639   | 142266  | 99766.2836  | 952.5189           |
| 40 | 0      | 71193   | 146028  | 102337.1896 | 956.0423           |
| 45 | 0      | 74491   | 149917  | 104881.7774 | 958.9156           |
| 50 | 0      | 73612   | 148087  | 107438.8263 | 963.1836           |
| 55 | 0      | 78205   | 158620  | 109989.6281 | 967.2429           |
| 60 | 0      | 80210   | 154721  | 112540.4592 | 970.1708           |
| 65 | 0      | 80626   | 158723  | 115106.1941 | 972.7903           |
| 70 | 0      | 82811   | 160788  | 117668.0933 | 976.9584           |

Table C.34. # of fails and minimum, maximum, average and standard deviation of the number of oracle queries for  $10^6$  repetitions of Algorithm 2 with 1000 particles and  $\mu = 80$

| R  | Fails | Minimum | Maximum | Average    | Standard deviation |
|----|-------|---------|---------|------------|--------------------|
| 5  | 1738  | 4574    | 40682   | 28031.4885 | 1945.7548          |
| 10 | 56    | 11198   | 43337   | 30607.4803 | 2048.0667          |
| 15 | 1     | 19392   | 46624   | 33163.4896 | 2152.5102          |
| 20 | 0     | 25475   | 50528   | 35718.5258 | 2251.9494          |
| 25 | 0     | 27591   | 54305   | 38278.1468 | 2346.4738          |
| 30 | 0     | 30115   | 56163   | 40836.8827 | 2441.6654          |
| 35 | 0     | 31025   | 57841   | 43394.7480 | 2526.3774          |
| 40 | 0     | 33172   | 61129   | 45955.3550 | 2610.1783          |
| 45 | 0     | 36524   | 62045   | 48514.9762 | 2694.3705          |
| 50 | 0     | 37159   | 67122   | 51068.2165 | 2774.7045          |
| 55 | 0     | 39510   | 69679   | 53620.3119 | 2851.4596          |
| 60 | 0     | 43035   | 73106   | 56183.0602 | 2925.0693          |
| 65 | 0     | 44113   | 75208   | 58741.6703 | 3003.4321          |
| 70 | 0     | 46962   | 76631   | 61300.5532 | 3071.1791          |

Table C.35. # of fails and minimum, maximum, average and standard deviation of the number of oracle queries for  $10^6$  repetitions of Algorithm 3 with 1000 particles and  $\mu = 80$



| R  | Fails  | Minimum | Maximum | Average    | Standard deviation |
|----|--------|---------|---------|------------|--------------------|
| 5  | 991625 | 23      | 22017   | 3936.0119  | 3539.2533          |
| 10 | 141155 | 229     | 26817   | 18238.5071 | 4088.6913          |
| 15 | 5007   | 694     | 27105   | 19945.3744 | 1482.5957          |
| 20 | 178    | 1326    | 27614   | 20312.2466 | 1286.8417          |
| 25 | 7      | 3865    | 27146   | 20631.0459 | 1280.5572          |
| 30 | 1      | 15250   | 27272   | 20950.8806 | 1286.0155          |
| 35 | 0      | 15946   | 28345   | 21269.7710 | 1288.2153          |
| 40 | 0      | 15910   | 28047   | 21584.3052 | 1291.9420          |
| 45 | 0      | 16573   | 29365   | 21901.8913 | 1293.7654          |
| 50 | 0      | 16521   | 29823   | 22219.7388 | 1296.2946          |
| 55 | 0      | 17168   | 29288   | 22536.5065 | 1297.8384          |
| 60 | 0      | 17380   | 29745   | 22856.1961 | 1301.6468          |
| 65 | 0      | 17835   | 29883   | 23171.8584 | 1303.7534          |
| 70 | 0      | 17672   | 30728   | 23490.2205 | 1306.3670          |

Table C.36. # of fails and minimum, maximum, average and standard deviation of the number of oracle queries for  $10^6$  repetitions of Algorithm 2 with 125 particles and  $\mu = 150$

| R  | Fails | Minimum | Maximum | Average   | Standard deviation |
|----|-------|---------|---------|-----------|--------------------|
| 5  | 2954  | 342     | 5015    | 3567.7794 | 241.7000           |
| 10 | 77    | 1533    | 5699    | 3887.7511 | 254.1947           |
| 15 | 2     | 2880    | 5828    | 4205.6119 | 267.2645           |
| 20 | 0     | 3178    | 6341    | 4522.7434 | 280.1169           |
| 25 | 0     | 3603    | 6610    | 4840.4259 | 292.1643           |
| 30 | 0     | 3749    | 7134    | 5157.9179 | 303.3228           |
| 35 | 0     | 3966    | 7528    | 5475.1769 | 314.3134           |
| 40 | 0     | 4304    | 7636    | 5792.8299 | 324.8783           |
| 45 | 0     | 4590    | 8200    | 6110.0810 | 335.2959           |
| 50 | 0     | 4791    | 8346    | 6427.4647 | 345.2632           |
| 55 | 0     | 5012    | 8680    | 6745.1640 | 354.6144           |
| 60 | 0     | 5358    | 9359    | 7062.6664 | 364.8543           |
| 65 | 0     | 5557    | 9307    | 7380.1786 | 373.4239           |
| 70 | 0     | 5895    | 9825    | 7697.6120 | 382.8709           |

Table C.37. # of fails and minimum, maximum, average and standard deviation of the number of oracle queries for  $10^6$  repetitions of Algorithm 3 with 125 particles and  $\mu = 150$

| R  | Fails  | Minimum | Maximum | Average    | Standard deviation |
|----|--------|---------|---------|------------|--------------------|
| 5  | 991606 | 56      | 44866   | 7900.6697  | 7117.2576          |
| 10 | 140843 | 609     | 53792   | 36621.1976 | 8220.3127          |
| 15 | 5104   | 1370    | 54612   | 40048.2808 | 2980.3527          |
| 20 | 181    | 2722    | 54079   | 40784.4320 | 2579.0162          |
| 25 | 6      | 18818   | 54880   | 41431.0001 | 2574.3050          |
| 30 | 0      | 31161   | 55336   | 42063.5458 | 2579.5387          |
| 35 | 0      | 31338   | 56721   | 42704.7072 | 2586.1462          |
| 40 | 0      | 32303   | 57387   | 43336.8190 | 2587.6622          |
| 45 | 0      | 33082   | 57541   | 43977.8210 | 2591.9175          |
| 50 | 0      | 33625   | 58658   | 44618.2815 | 2599.5720          |
| 55 | 0      | 34127   | 59394   | 45255.0186 | 2604.8972          |
| 60 | 0      | 34587   | 60574   | 45886.6671 | 2610.6267          |
| 65 | 0      | 34515   | 59675   | 46530.9800 | 2616.4212          |
| 70 | 0      | 35837   | 61274   | 47168.8694 | 2618.2031          |

Table C.38. # of fails and minimum, maximum, average and standard deviation of the number of oracle queries for  $10^6$  repetitions of Algorithm 2 with 216 particles and  $\mu = 150$

| R  | Fails | Minimum | Maximum | Average    | Standard deviation |
|----|-------|---------|---------|------------|--------------------|
| 5  | 2329  | 937     | 11030   | 8095.4643  | 497.3407           |
| 10 | 58    | 5365    | 12306   | 8737.4271  | 522.6686           |
| 15 | 1     | 6995    | 12657   | 9375.3278  | 548.0367           |
| 20 | 0     | 7495    | 13782   | 10012.7649 | 572.8338           |
| 25 | 0     | 7965    | 14121   | 10650.1500 | 596.2434           |
| 30 | 0     | 8176    | 15215   | 11287.6006 | 618.6946           |
| 35 | 0     | 9106    | 16204   | 11925.8409 | 640.3208           |
| 40 | 0     | 9565    | 16007   | 12562.8546 | 660.9694           |
| 45 | 0     | 10093   | 17563   | 13199.8430 | 681.4702           |
| 50 | 0     | 10632   | 17767   | 13837.7113 | 700.9023           |
| 55 | 0     | 11348   | 18398   | 14475.9172 | 720.4413           |
| 60 | 0     | 11748   | 19119   | 15114.0568 | 738.7913           |
| 65 | 0     | 12333   | 20315   | 15748.6789 | 757.0198           |
| 70 | 0     | 12957   | 20667   | 16386.4846 | 774.5531           |

Table C.39. # of fails and minimum, maximum, average and standard deviation of the number of oracle queries for  $10^6$  repetitions of Algorithm 3 with 216 particles and  $\mu = 150$

| R  | Fails  | Minimum | Maximum | Average    | Standard deviation |
|----|--------|---------|---------|------------|--------------------|
| 5  | 991722 | 171     | 87389   | 15787.1779 | 14214.6269         |
| 10 | 141218 | 1133    | 104564  | 73370.9227 | 16477.8624         |
| 15 | 5119   | 2584    | 106443  | 80267.4885 | 5956.5470          |
| 20 | 191    | 8396    | 110829  | 81734.6673 | 5176.2931          |
| 25 | 5      | 18438   | 112943  | 83029.7071 | 5154.9605          |
| 30 | 0      | 61565   | 112791  | 84295.9919 | 5163.6106          |
| 35 | 0      | 63555   | 112327  | 85583.6788 | 5176.9628          |
| 40 | 0      | 64111   | 113811  | 86853.8841 | 5194.6757          |
| 45 | 0      | 66188   | 115603  | 88128.6841 | 5194.7385          |
| 50 | 0      | 66729   | 117867  | 89402.4787 | 5205.8579          |
| 55 | 0      | 67905   | 117424  | 90693.6458 | 5219.0534          |
| 60 | 0      | 69315   | 119052  | 91965.4294 | 5231.4581          |
| 65 | 0      | 69658   | 124526  | 93241.4550 | 5240.3562          |
| 70 | 0      | 72515   | 124582  | 94512.2240 | 5245.4772          |

Table C.40. # of fails and minimum, maximum, average and standard deviation of the number of oracle queries for  $10^6$  repetitions of Algorithm 2 with 512 particles and  $\mu = 150$

| R  | Fails | Minimum | Maximum | Average    | Standard deviation |
|----|-------|---------|---------|------------|--------------------|
| 5  | 1875  | 3230    | 23859   | 17501.6378 | 1012.9452          |
| 10 | 54    | 8240    | 25333   | 18787.8901 | 1061.4635          |
| 15 | 2     | 15497   | 26884   | 20064.1490 | 1112.5338          |
| 20 | 0     | 15898   | 28518   | 21342.7490 | 1160.4791          |
| 25 | 0     | 17546   | 30946   | 22622.6177 | 1206.2732          |
| 30 | 0     | 18106   | 32741   | 23897.8824 | 1249.8472          |
| 35 | 0     | 19230   | 32645   | 25176.4913 | 1293.0121          |
| 40 | 0     | 20251   | 34749   | 26454.0754 | 1335.0615          |
| 45 | 0     | 21517   | 35411   | 27730.7457 | 1376.7511          |
| 50 | 0     | 22288   | 37427   | 29007.4129 | 1415.1234          |
| 55 | 0     | 24033   | 38662   | 30284.7649 | 1452.5908          |
| 60 | 0     | 24633   | 39454   | 31562.9967 | 1489.6124          |
| 65 | 0     | 26049   | 42284   | 32839.0674 | 1528.9651          |
| 70 | 0     | 26944   | 42412   | 34118.9010 | 1563.3344          |

Table C.41. # of fails and minimum, maximum, average and standard deviation of the number of oracle queries for  $10^6$  repetitions of Algorithm 3 with 512 particles and  $\mu = 150$

| R  | Fails  | Minimum | Maximum | Average     | Standard deviation |
|----|--------|---------|---------|-------------|--------------------|
| 5  | 991505 | 414     | 180395  | 31684.0844  | 28523.4480         |
| 10 | 140787 | 2180    | 206019  | 146916.3709 | 32947.0996         |
| 15 | 5019   | 5198    | 219209  | 160687.7883 | 11937.5891         |
| 20 | 147    | 12020   | 221281  | 163628.5918 | 10357.0073         |
| 25 | 6      | 36939   | 227243  | 166217.6099 | 10331.6578         |
| 30 | 0      | 117389  | 227737  | 168767.3977 | 10334.1867         |
| 35 | 0      | 127876  | 226940  | 171312.8985 | 10360.0652         |
| 40 | 0      | 129330  | 228330  | 173867.6444 | 10383.3829         |
| 45 | 0      | 132929  | 237269  | 176427.3668 | 10392.6679         |
| 50 | 0      | 135468  | 235256  | 178971.1799 | 10419.4715         |
| 55 | 0      | 139009  | 233572  | 181569.7748 | 10439.0855         |
| 60 | 0      | 141583  | 238208  | 184098.0041 | 10464.7435         |
| 65 | 0      | 142251  | 242487  | 186666.0778 | 10483.9050         |
| 70 | 0      | 142234  | 245575  | 189222.6928 | 10520.2681         |

Table C.42. # of fails and minimum, maximum, average and standard deviation of the number of oracle queries for  $10^6$  repetitions of Algorithm 2 with 1000 particles and  $\mu = 150$

| R  | Fails | Minimum | Maximum | Average    | Standard deviation |
|----|-------|---------|---------|------------|--------------------|
| 5  | 1673  | 6193    | 48431   | 36746.5779 | 2044.8347          |
| 10 | 42    | 30478   | 53071   | 39321.0275 | 2147.6401          |
| 15 | 3     | 31524   | 55663   | 41873.6086 | 2244.5502          |
| 20 | 0     | 32971   | 57502   | 44433.0812 | 2337.9566          |
| 25 | 0     | 35685   | 62610   | 46991.5814 | 2431.9973          |
| 30 | 0     | 37507   | 63685   | 49547.2117 | 2522.8804          |
| 35 | 0     | 40071   | 66778   | 52107.0978 | 2607.5169          |
| 40 | 0     | 40262   | 69429   | 54662.2551 | 2687.0371          |
| 45 | 0     | 44408   | 74472   | 57220.2541 | 2768.7009          |
| 50 | 0     | 46548   | 74999   | 59780.8423 | 2842.9850          |
| 55 | 0     | 48635   | 78220   | 62337.2892 | 2925.5149          |
| 60 | 0     | 48742   | 84650   | 64890.8063 | 2998.5694          |
| 65 | 0     | 53761   | 82784   | 67451.0666 | 3066.7362          |
| 70 | 0     | 55717   | 86997   | 70007.5573 | 3139.5400          |

Table C.43. # of fails and minimum, maximum, average and standard deviation of the number of oracle queries for  $10^6$  repetitions of Algorithm 3 with 1000 particles and  $\mu = 150$
